# Supplementary material for: Bursa-Derived Cells Show a Distinct Mechano-Response to Physiological and Pathological Loading in vitro
Source: PubMed Central journal article supplement (PMC8201779; doi:10.3389/fcell.2021.657166), 2021-05-31
Supplement: Data_Sheet_2.pdf [file Data_Sheet_2.pdf]

## *Supplementary Material*

**Supplementary Table 2:** Surface marker expression of bursa-derived cells compared to the literature

| Marker classification          | Antigen | Fluorochrome | % positive cells    |                                                         |
|--------------------------------|---------|--------------|---------------------|---------------------------------------------------------|
|                                |         |              | Bursa-derived cells | Bursa stem cells from literature                        |
| Mesenchymal progenitor markers | CD29    | PE           | 99.3 (97.9-100)     |                                                         |
|                                | CD44    | PE-Cy7       | 98.7 (96.2-100)     | 70-95 <sup>2</sup> ; 90 <sup>3</sup>                    |
|                                | CD73    | APC          | 95.3 (85.8-100)     | 97.5 <sup>1</sup> ; 90 <sup>3</sup>                     |
|                                | CD90    | PerCP-Cy5.5  | 90.7 (70.2-100)     | 95.2 <sup>1</sup> ; 81 <sup>2</sup> ; 100 <sup>3</sup>  |
|                                | CD105   | FITC         | 99.7 (99.1-100)     | 98.1 <sup>1</sup> ; 12.8 <sup>2</sup> ; 95 <sup>3</sup> |
| Hematopoietic markers          | CD11b   | V450         | 1.7 (0.8-3.3)       |                                                         |
|                                | CD14    | PC-Cy7       | 1.5 (0.7-2.7)       |                                                         |
|                                | CD19    | PE           | 0.2 (0-0.6)         |                                                         |
|                                | CD34    | FITC         | 5.5 (1.2-9.3)       | 7.7 <sup>1</sup> ; 0 <sup>2</sup>                       |
|                                | CD45    | PerCP        | 1.2 (0.1-0.5)       | 0 <sup>2,3</sup>                                        |

1) (Steinert et al. 2015); 2) (Utsunomiya et al. 2013); 3) (Morikawa et al. 2020)

### References:

- Morikawa, D., L. N. Muench, J. B. Baldino, C. Kia, J. Johnson, A. Otto, L. Pauzenberger, F. Dynna, M. B. R. McCarthy, and A. D. Mazzocca. 2020. 'Comparison of Preparation Techniques for Isolating Subacromial Bursa-Derived Cells as a Potential Augment for Rotator Cuff Repair', *Arthroscopy*, 36: 80-85.
- Steinert, A. F., M. Kunz, P. Prager, S. Gobel, L. Klein-Hitpass, R. Ebert, U. Noth, F. Jakob, and F. Gohlke. 2015. 'Characterization of bursa subacromialis-derived mesenchymal stem cells', *Stem Cell Res Ther*, 6: 114.
- Utsunomiya, H., S. Uchida, I. Sekiya, A. Sakai, K. Moridera, and T. Nakamura. 2013. 'Isolation and characterization of human mesenchymal stem cells derived from shoulder tissues involved in rotator cuff tears', *Am J Sports Med*, 41: 657-68.
