# Supplementary material for: Bursa-Derived Cells Show a Distinct Mechano-Response to Physiological and Pathological Loading in vitro
Source: PubMed Central journal article supplement (PMC8201779; doi:10.3389/fcell.2021.657166), 2021-05-31
Supplement: Image_1.pdf [file Image_1.pdf]

*Supplementary Material*

Supplementary Figures

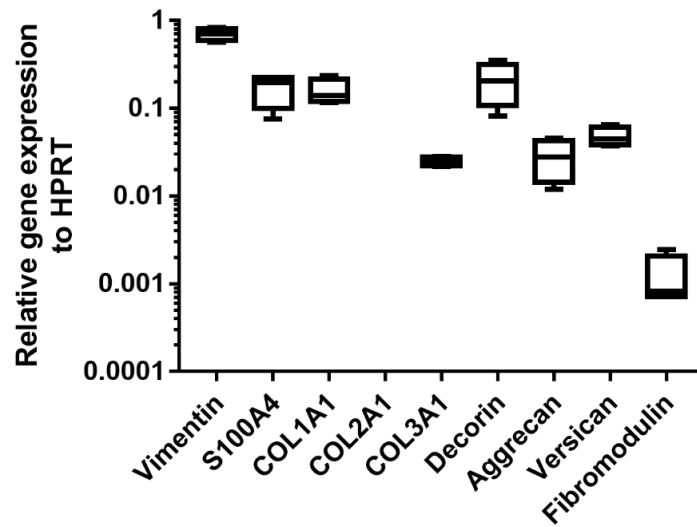

**Supplementary Figure 1:** Expression profile of fibroblast-associated and ECM markers of bursa-derived cells given as relative gene expression to the housekeeping gene HPRT.
