# Supplementary material for: Bursa-Derived Cells Show a Distinct Mechano-Response to Physiological and Pathological Loading in vitro
Source: PubMed Central journal article supplement (PMC8201779; doi:10.3389/fcell.2021.657166), 2021-05-31
Supplement: Image_2.pdf [file Image_2.pdf]

## Supplementary Material

### Supplementary Figures

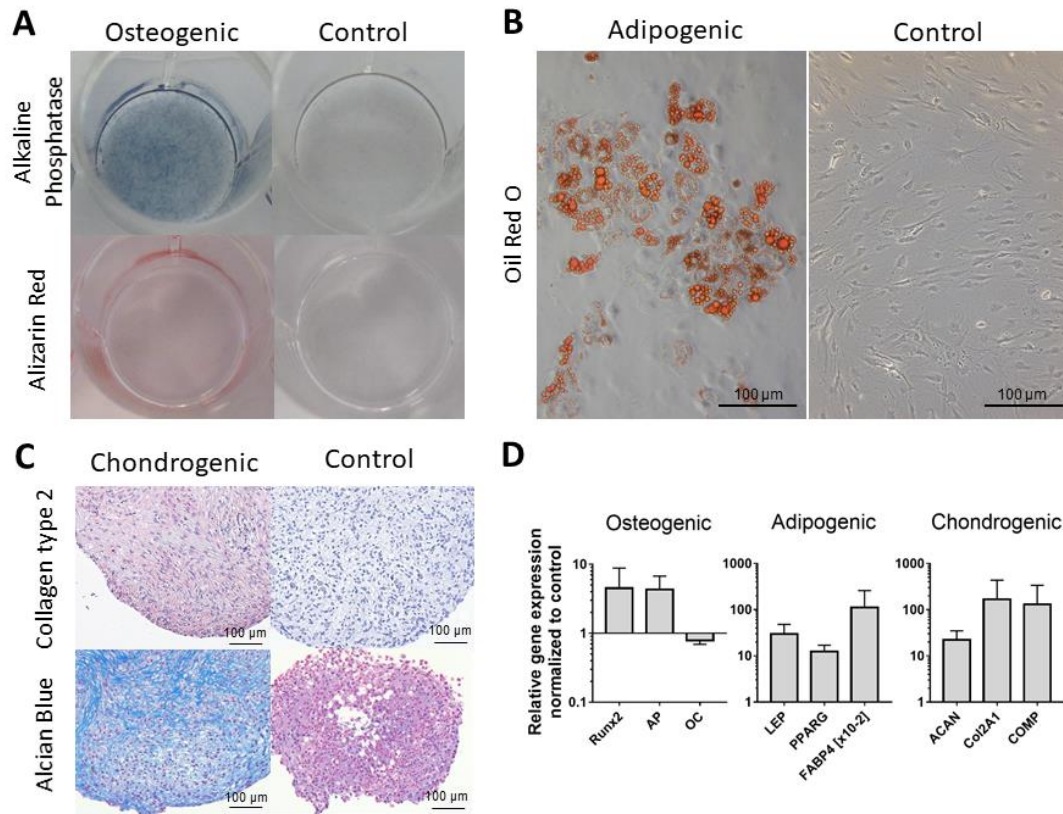

**Supplementary Figure 2:** Representative images of multipotent differentiation potential of bursa-derived cells. A) Alizarin red staining was relatively weak, but alkaline phosphatase staining revealed differentiation into the osteogenic direction. Macroscopic pictures of 12-well plate. B) Adipogenic differentiation visualized by Oil Red O staining of lipid vacuoles. Scale: 100  $\mu$ m. C) Chondrogenic differentiated cell pellets stained for Collagen type II and Alcian Blue. Scale: 100  $\mu$ m. D) Relative gene expression of osteogenic, adipogenic and chondrogenic markers normalized to 18s rRNA and given as fold to the undifferentiated control (line at 1).
